# Supplementary material for: Curcumin-loaded PEGylated mesoporous silica nanoparticles for effective photodynamic therapy
Source: Royal Society of Chemistry journal article supplement (doi:10.1039/d0ra04778c), 2020-01-01
Supplement: d0ra04778c1.pdf [file d0ra04778c1.pdf]

## Electronic Supplementary Information

### **Curcumin-loaded PEGylated mesoporous silica nanoparticles for effective photodynamic therapy**

Gaizhen Kuang,<sup>a</sup> Qingfei Zhang,<sup>cd</sup> Shasha He<sup>\*b</sup> and Ying Liu<sup>\*a</sup>

<sup>a</sup> Department of Medical Oncology, Affiliated Cancer Hospital of Zhengzhou University, Zhengzhou 450008, P. R. China

<sup>b</sup> School of Chemical and Biomedical Engineering, Nanyang Technological University, Singapore 637457, Singapore

<sup>c</sup> State Key Laboratory of Polymer Physics and Chemistry, Changchun Institute of Applied Chemistry, Chinese Academy of Sciences, Changchun 130022, P. R. China

<sup>d</sup> University of Science and Technology of China, Hefei 230026, P. R. China

\* Corresponding Authors:

Shasha He, E-mail: lisahe1005@126.com

Ying Liu, E-mail: yaya7207@126.com

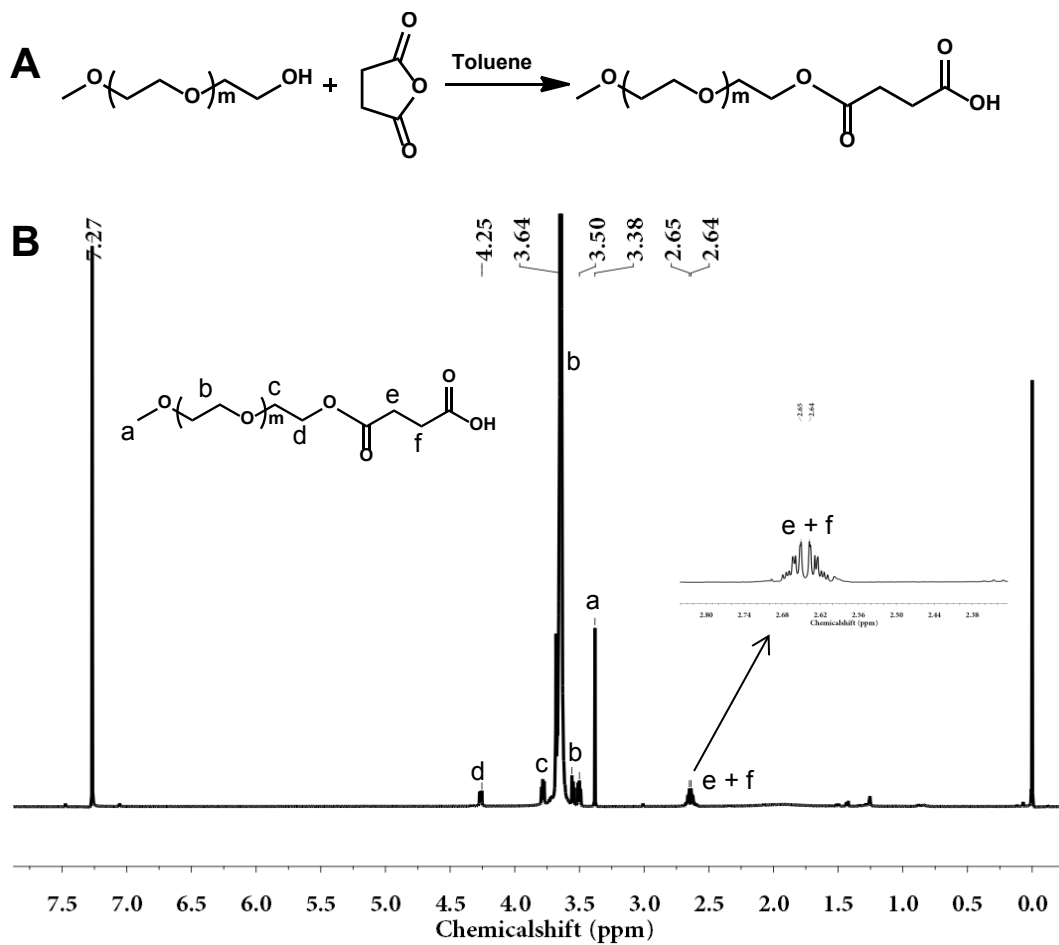

Fig. S1. Synthesis (A) and characterization (B) of mPEG<sub>2k</sub>-COOH.

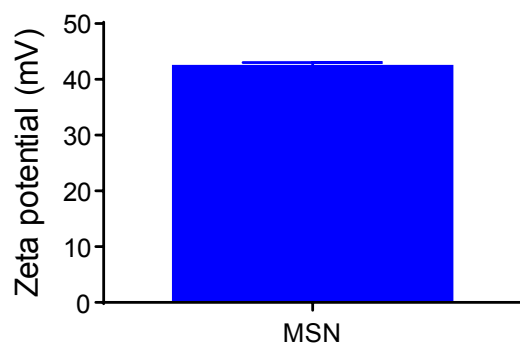

Fig. S2. Zeta potential of MSN.

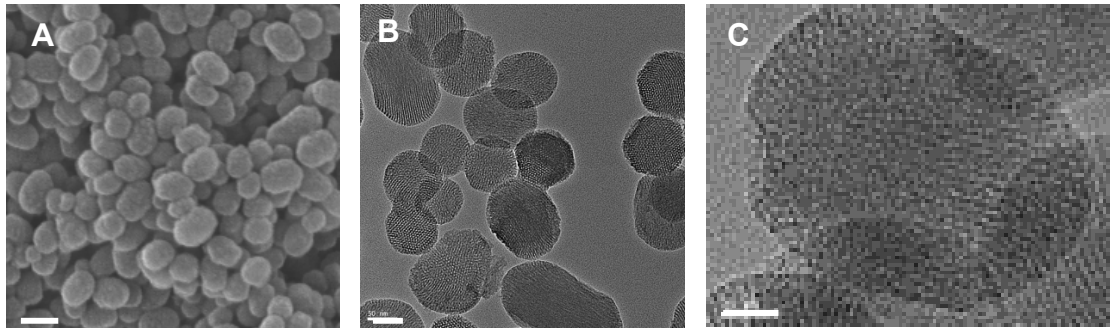

**Fig. S3.** (A) SEM (Scale bar = 200 nm) and (B) TEM of MSN-NH<sub>2</sub> (Scale bar = 50 nm). (C) TEM of MSN-PEG (Scale bar = 10 nm).

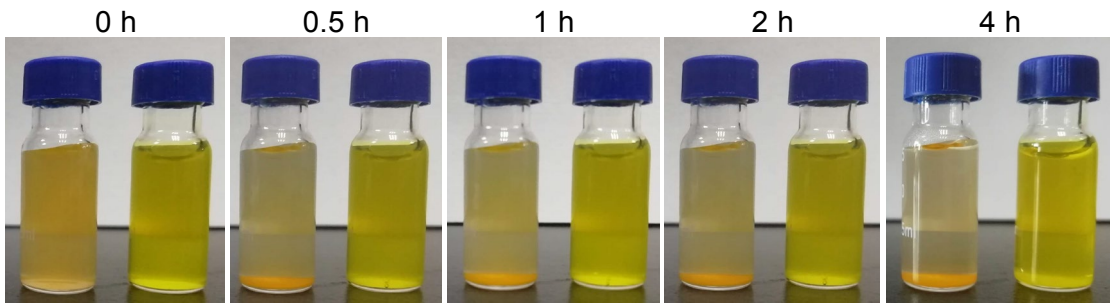

**Fig. S4.** The photographs of Cur and MSN-PEG@Cur after incubation in water for different time intervals.

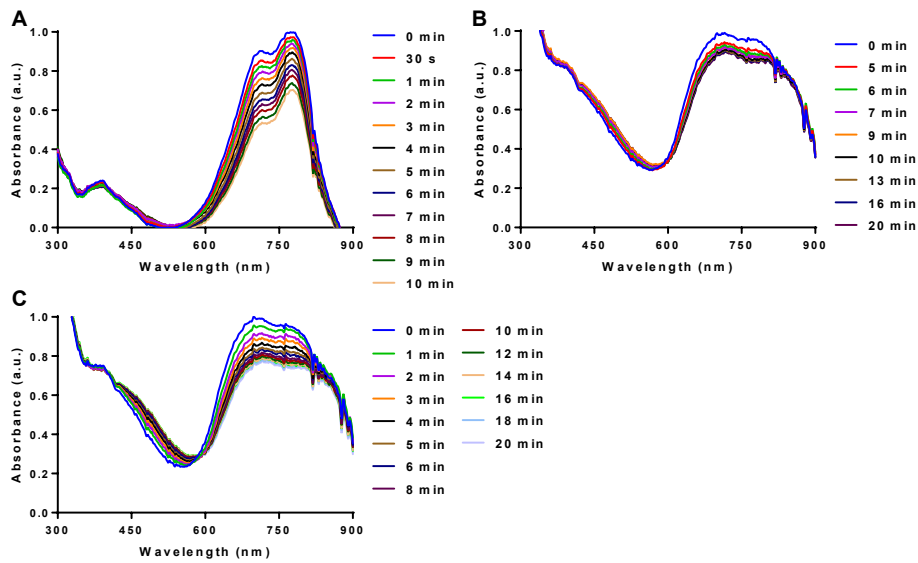

**Fig. S5.** Time-dependent UV absorption spectra of ICG with (A) Cur, (B) MSN-PEG@Cur after irradiation with a 430 nm light for different time intervals. (C) Time-dependent UV absorption spectra of ICG with MSN-PEG@Cur that incubated with ABS (pH 5.0) for 4 h and then irradiated for different time intervals. (430 nm, 20 mW/cm<sup>2</sup>).

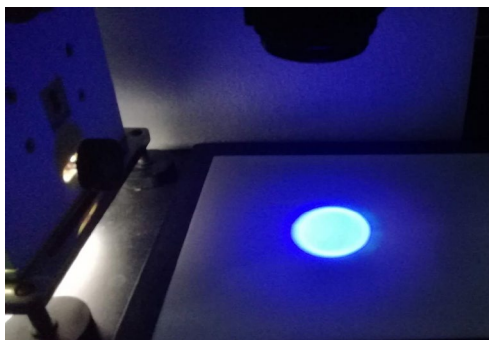

**Fig. S6.** Light source. (430 nm, 20 mW/cm<sup>2</sup>).
